# Supplementary material for: Explanation for the conductivity difference of half-Heusler transparent conductors via ionization energy
Source: Royal Society of Chemistry journal article supplement (doi:10.1039/d1cp00382h), 2021-01-01
Supplement: d1cp00382h1.pdf [file d1cp00382h1.pdf]

# Explanation of the Conductivity Difference of Half-Heusler Transparent Conductors by Ionization Energy

*Mi Zhong<sup>a</sup>, Wei Zeng<sup>\*\*, b</sup>, Fu-Sheng Liu<sup>a</sup>, Bin Tang<sup>c</sup>, Qi-Jun Liu<sup>\*, a</sup>*

<sup>a</sup> School of Physical Science and Technology, Southwest Jiaotong University, Key Laboratory of Advanced Technologies of Materials, Ministry of Education of China, Chengdu 610031, People's Republic of China

<sup>b</sup> Teaching and Research Group of Chemistry, College of Medical Technology, Chengdu University of Traditional Chinese Medicine, Chengdu 610075, People's Republic of China

<sup>c</sup> State Key Laboratory of Solidification Processing, Northwestern Polytechnical University, Xi'an 710072, People's Republic of China.

## **Corresponding Author**

\* E-mail: [qijunliu@home.swjtu.edu.cn](mailto:qijunliu@home.swjtu.edu.cn)

\*\* E-mail: [zengwei\\_chemistry@126.com](mailto:zengwei_chemistry@126.com)

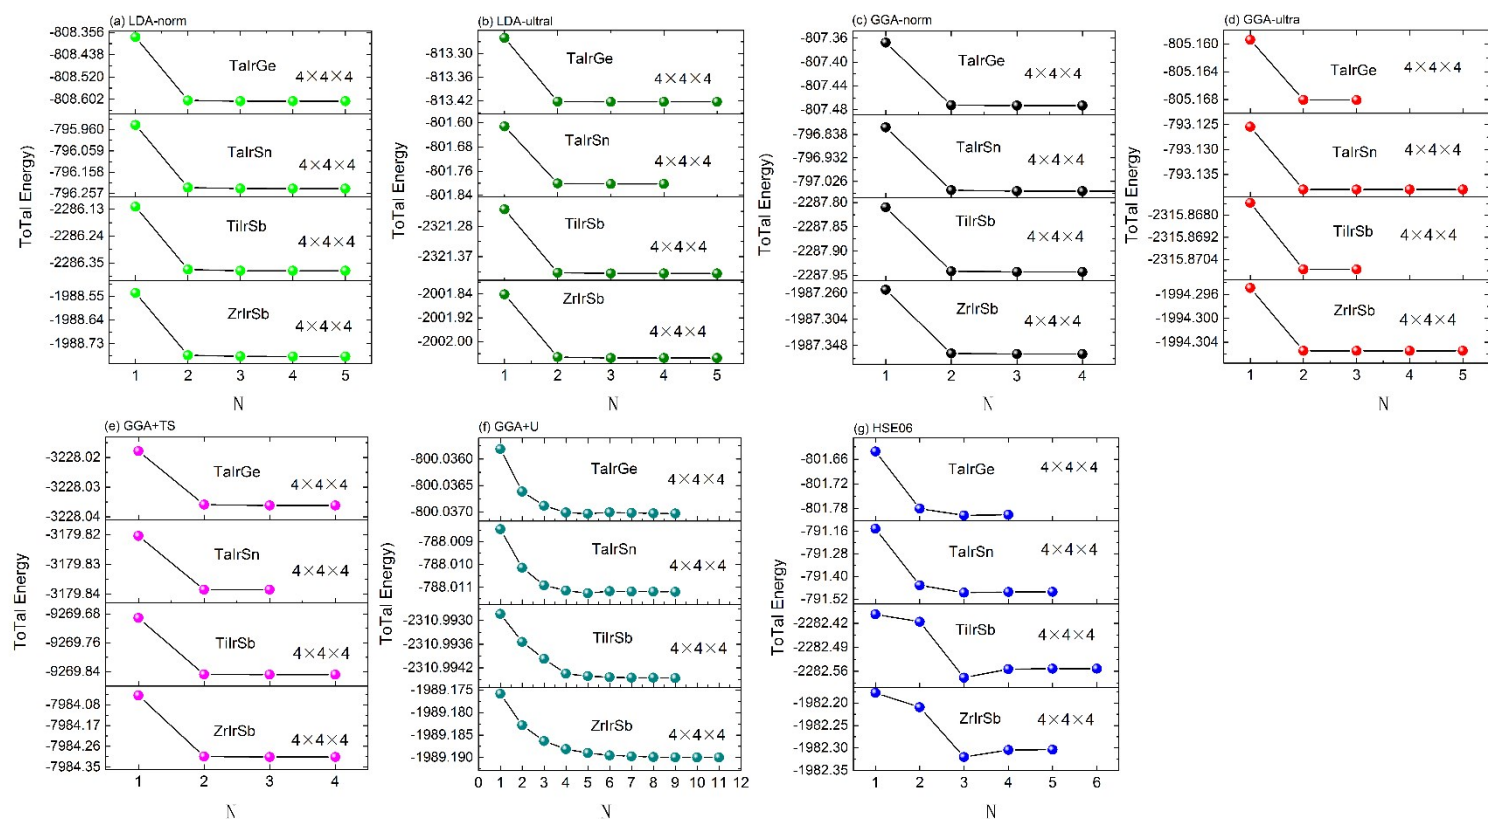

**Figure S1.** Calculated total energy as a function of N for ABX compounds with LDA, GGA, GGA+TS, GGA+U and HSE06 functional for testing the convergence of the k-point mesh.

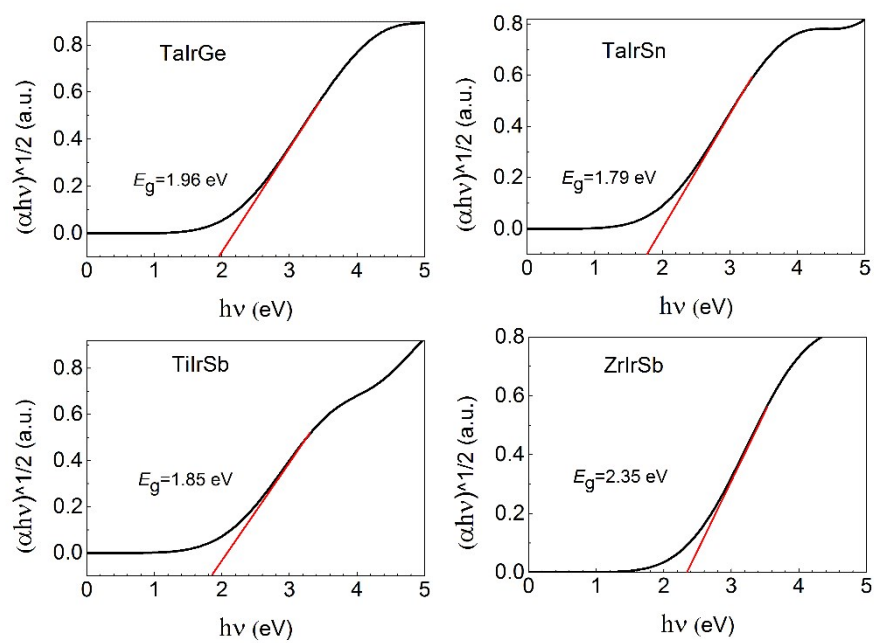

**Figure S2.** The determination of indirect band gaps of ABX compounds (HSE06).

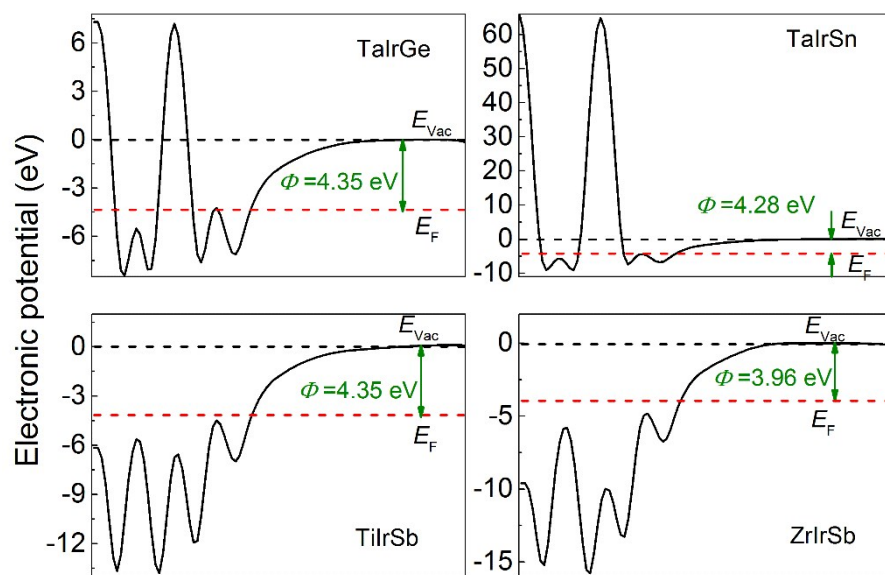

**Figure S3.** Calculated electrostatic potentials ABX system with slab with a width of 7 layers.

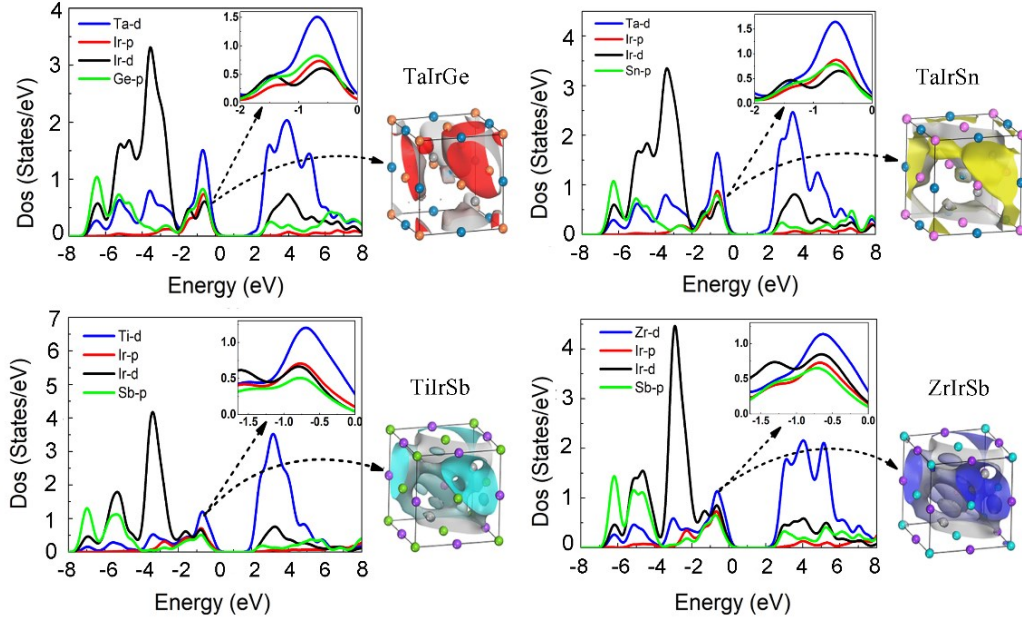

**Figure S4.** Partial density of states (PDOS) of TaIrGe, TaIrSn, TiIrSb, and ZrIrSb within HSE06. The corresponding modulus of the crystalline orbital near the valence band edge, and isovalue of  $5 \times 10^{-2}$  a.u. is adopted

Table S1 The calculated lattice constants of TaIrGe, TaIrSn, TiIrSb and ZrIrSb along with the previous reported values.

|        | $a$ (LDA-ultra) | $a$ (LDA-norm) | $a$ (GGA-ultra) | $a$ (GGA-norm) | $a$ (GGA+TS) | $a$ (GGA+U) | $a$ (HSE06) | Ref. [9] |
|--------|-----------------|----------------|-----------------|----------------|--------------|-------------|-------------|----------|
| TaIrGe | 5.893           | 5.861          | 6.059           | 5.914          | 6.002        | 6.039       | 5.852       | 6.026    |
|        | -2.21%          | -2.74%         | 0.55%           | -1.86%         | -0.40%       | 0.22%       | -2.89%      |          |
| TaIrSn | 6.085           | 6.043          | 6.273           | 6.054          | 6.206        | 6.253       | 5.997       | 6.233    |
|        | -2.37%          | -3.05%         | 0.64%           | -2.87%         | -0.43%       | 0.32%       | -3.79%      |          |
| TiIrSb | 6.010           | 5.980          | 6.148           | 6.032          | 6.093        | 6.159       | 5.881       | 6.169    |
|        | -2.58%          | -3.06%         | -0.34%          | -2.22%         | -1.23%       | -0.16%      | -4.67%      |          |
| ZrIrSb | 6.200           | 6.189          | 6.334           | 6.246          | 6.275        | 6.327       | 6.106       | 6.372    |
|        | -2.70%          | -2.87%         | -0.60%          | -1.98%         | -1.52%       | -0.71%      | -4.17%      |          |

Table S2 The calculated band gaps using different functional along with the previously experimental and theoretical results.

| $E_g(E_g^{dir})$ | GGA  | GGA+TS | GGA+U       | HSE06       | Exp. <sup>[9, 18]</sup> | HSE06 <sup>[9]</sup> | HSE06 <sup>[18]</sup> |
|------------------|------|--------|-------------|-------------|-------------------------|----------------------|-----------------------|
| TaIrGe           | 1.20 | 1.19   | 1.62 (2.68) | 1.84 (3.19) | 3.36 <sup>[18]</sup>    | 1.62 (2.49)          | 1.74 (3.1)            |
| TaIrSn           | 1.16 | 1.16   | 1.54 (2.24) | 1.75 (2.77) | 2.4 <sup>[9]</sup>      | 1.55 (2.26)          | 1.61 (2.33)           |
| TiIrSb           | 0.98 | 1.01   | 1.41 (2.16) | 1.81 (2.64) | 2.4 <sup>[9]</sup>      | 1.63 (2.39)          | 1.69 (2.51)           |
| ZrIrSb           | 1.61 | 1.65   | 1.82 (2.43) | 2.22 (3.12) | 3.2 <sup>[9]</sup>      | 1.91 (2.25)          | 2.06 (2.38)           |

**Table S3.** The effective masses of holes at VBM, Sub-VBM (sub-maximum of valence bands), and CBM.

| System | VBM-L | VBM-R | Sub-VBM-L | Sub-VBM-R | CBM-L | CBM-R |
|--------|-------|-------|-----------|-----------|-------|-------|
| TaIrGe | 0.78  | 0.83  | 0.41      | 0.92      | 0.51  | 0.36  |
| TaIrSn | 0.76  | 0.92  | 0.41      | 1.04      | 0.57  | 0.43  |
| TiIrSb | 2.23  | 0.72  | 5.85      | 1.01      | 0.81  | 0.67  |
| ZrIrSb | 2.21  | 0.65  | 2.62      | 0.90      | 0.75  | 0.46  |
